# Supplementary material for: Dstyk mutation leads to congenital scoliosis-like vertebral malformations in zebrafish via dysregulated mTORC1/TFEB pathway
Source: PubMed Central journal article supplement (PMC6981171; doi:10.1038/s41467-019-14169-z), 2020-01-24
Supplement: 41467_2019_14169_MOESM3_ESM.pdf [file 41467_2019_14169_MOESM3_ESM.pdf]

## **Description of Additional Supplementary Files**

**Supplementary Movie 1.** Live confocal time-lapse imaging of vacuole expansion for WT from 20 hpf to 30 hpf used internal membrane tracker. The time interval between frames is 10 min. Scale bar represent 20  $\mu\text{m}$ .

**Supplementary Movie 2.** Live confocal time-lapse imaging of vacuole expansion for *dstyk* mutant from 20 hpf to 30 hpf used internal membrane tracker. The time interval between frames is 10 min. Scale bar represent 20  $\mu\text{m}$ .
